## Cellular mechanisms underlying temperature-induced bleaching in the tropical sea anemone *Aiptasia pulchella*

Sara J. Sawyer\* and Leonard Muscatine‡

Department of Organismic Biology, Ecology and Evolution, University of California – Los Angeles, 405 Hilgard Avenue, Los Angeles, CA 90095, USA

\*Present address: Department of Biological Sciences, Southern Illinois University, Edwardsville, Box 1651, Edwardsville, IL 62026, USA  
(e-mail: sasawye@siue.edu)

‡Present address: 2410 Soda Canyon Road, Napa Valley, CA 94558, USA

Accepted 13 July 2001

### Summary

Temperature-induced bleaching in symbiotic cnidarians is a result of the detachment and loss of host cells containing symbiotic algae. We tested the hypothesis that host cell detachment is evoked through a membrane thermotropic event causing an increase in intracellular calcium concentration,  $[Ca^{2+}]_i$ , which could then cause collapse of the cytoskeleton and perturb cell adhesion. Electron paramagnetic resonance measurements of plasma membranes from the tropical sea anemone *Aiptasia pulchella* and the Hawaiian coral *Pocillopora damicornis* labeled with 2,2,6,6-tetramethylpiperidine-1-oxyl (TEMPO) revealed no membrane thermotropic event. In addition, intracellular imaging using Fura-2AM as well as labeling anemones with  $^{45}Ca$  revealed no significant change in  $[Ca^{2+}]_i$ . However, bleaching could be evoked at ambient temperature with  $25\text{ mmol l}^{-1}$  caffeine without affecting  $[Ca^{2+}]_i$ .  $[Ca^{2+}]_i$  could be altered with

ionomycin in isolated host cells, but ionomycin could not induce bleaching in *A. pulchella*. As caffeine can affect levels of intracellular protein phosphorylation, the ability of other agents that alter intracellular levels of protein phosphorylation to evoke bleaching was investigated. The protein phosphatase inhibitor vanadate could induce bleaching in *A. pulchella*. Two-dimensional gels of  $^{32}P$ -labeled proteins from cold-shocked, caffeine-treated and control anemones show that both temperature shock and caffeine alter the array of phosphorylated host soluble proteins. We conclude that cnidarian bleaching is linked to a temperature-induced alteration in protein phosphorylation.

Key words: coral, bleaching, cellular dysfunction, protein phosphorylation, sea anemone, *Aiptasia pulchella*, coral, *Pocillopora damicornis*.

### Introduction

Cnidarian bleaching can be defined generally as a decline in the population of the symbiotic algae, a reduction in the pigment content of the algae or both (Coles and Jokiel, 1977; Hoegh-Guldberg and Smith, 1989; Kleppel et al., 1989; Porter et al., 1989; Glynn and D’Croze, 1990; Szmant and Gassman, 1990; Lesser, 1996). Major bleaching events on coral reefs are becoming more common and appear to be caused by increased water temperature (Goreau and Hayes, 1994; Brown et al., 1996) and/or by increased exposure to ultraviolet radiation (Brown and Suharsono, 1990; Gates, 1990; Jokiel and Coles, 1990; Lesser et al., 1990; Gleason and Wellington, 1993; Le Tissier and Brown, 1996).

While there have been many ecological studies of thermal bleaching in corals and on the recovery of corals from bleaching (Brown and Suharsono, 1990; Gates, 1990; Glynn and D’Croze, 1990; Hayes and Bush, 1990; Williams and Bunkley-Williams, 1990; Fitt et al., 1993; Gleason, 1993; Brown et al., 1996), few have investigated the underlying cellular mechanisms. Several studies have demonstrated that

temperature and ultraviolet radiation inhibit photosynthesis and can induce oxidative stress in the algae (Lesser et al., 1990; Lesser, 1996; Jones et al., 1998; Warner et al., 1999). Other studies report changes in enzyme activity (O’Brien and Wyttenbach, 1980; Suharsono et al., 1993) and the increased production of heat-shock proteins in the host during bleaching (Miller et al., 1992; Sharp et al., 1994; Black et al., 1995). Neither line of study offers suggestions as to how changes in temperature cause the loss of the symbiotic algae.

Gates et al. (Gates et al., 1992) demonstrated that thermal bleaching in the Hawaiian reef coral *Pocillopora damicornis* and in the sea anemone *Aiptasia pulchella* occurred predominantly by release of intact host cells with their contained symbiotic algae. That is, thermal stress somehow affected the adhesive properties of the host cells. After analyzing sections of bleached coral, Brown et al. (Brown et al., 1995) suggested that tissue necrosis might explain bleaching, but these authors also observed released algae still within host cells. Huang et al. (Huang et al., 1998) speculated

that heat shock might induce algal release through exocytosis after demonstrating that heat shock alters  $[Ca^{2+}]_i$  in the coral *Acropora grandis*; however, these authors did not directly investigate coral bleaching. Whereas cell adhesion dysfunction may not be the only potential mechanism of temperature-induced bleaching [see (Brown et al., 1995; Le Tissier and Brown, 1996)], its occurrence is unequivocal. That is, bleaching anemones and corals release intact host cells containing their endosymbionts.

On the basis of an Arrhenius plot of the rate of release of symbiotic dinoflagellates with decreasing temperature, Muscatine et al. (Muscatine et al., 1991) suggested that a membrane thermotropic event (Melchior and Steim, 1976; Watson and Morris, 1987) might initiate bleaching. By analogy with observations on insect cell cultures (Van Bergen en Henegouwen et al., 1985; Coakley, 1987; Cress et al., 1990; Walter et al., 1990), Gates et al. (Gates et al., 1992) hypothesized that temperature stress might induce thermotropic phase transitions in host cell membranes which result in the passive influx of  $Ca^{2+}$  (Melchior and Steim, 1976; Quinn, 1989; Cheng and Lepock, 1992; Drobniš et al., 1993). As  $[Ca^{2+}]_i$  controls the activity of elements of the cytoskeleton and the cell adhesion molecules to which they are linked (Hirano et al., 1987; Nagafuchi and Takeichi, 1988; Forscher, 1989; Matsumura and Yamashiro, 1993; Weeds and Maciver, 1993), changes in  $[Ca^{2+}]_i$  could cause loss of adhesion by causing collapse of the cytoskeleton, which is interconnected with the cytoplasmic domain of cell adhesion molecules (Geiger et al., 1992; Takeichi et al., 1992; Sastry and Horowitz, 1993). Thus, a temperature-induced change in  $[Ca^{2+}]_i$  might induce cell adhesion dysfunction.

In this study, we addressed the hypothesis that temperature stress causes a membrane thermotropic event that results in an elevated  $[Ca^{2+}]_i$ , causing release of host cells (bleaching). We tested this hypothesis by measuring host cell plasma membrane fluidity using electron paramagnetic resonance (EPR) in the tropical reef coral *Pocillopora damicornis* and in the tropical sea anemone *Aiptasia pulchella* and by investigating the role of  $[Ca^{2+}]_i$  using pharmacological agents, the  $Ca^{2+}$ -specific fluorochrome Fura-2AM and  $^{45}CaCl_2$  to investigate  $Ca^{2+}$  flux in *A. pulchella*. In addition, we investigated the role of phosphorylation of host cell proteins in cnidarian bleaching using pharmacological agents and two-dimensional gel electrophoresis.

## Materials and methods

### Animal collection and maintenance

*Aiptasia pulchella* (Carlgren) and *Pocillopora damicornis* L. were collected from Kaneohe Bay, Oahu, HI, USA, on Checker Reef adjacent to the Hawaii Institute of Marine Biology. Both were transported back to the University of California at Los Angeles (UCLA) and maintained in an aquarium at 25 °C on a 12h:12h light:dark cycle. *P. damicornis* colonies were used within 48h of collection. *A. pulchella* were fed twice weekly on *Artemia* nauplia, but were starved for 24h in an incubator

(Percival Scientific, model 1-35 VL) at 25 °C on a 12h:12h light:dark cycle at 100  $\mu\text{mol quanta m}^{-2} \text{s}^{-1}$  before being used in experiments.

### Electron paramagnetic resonance

To isolate host cell membranes, *A. pulchella* were homogenized in a Teflon-glass tissue grinder in 1 ml of filtered sea water (FSW), and *P. damicornis* were scrubbed with a toothbrush in 3 ml of FSW on ice. Homogenates were centrifuged (Damon/IEC, model HN-S, for 4 min at 500g) to pellet the algae. The supernatant was decanted and centrifuged at 5000g for 15 min at 4 °C (Eppendorf, model 5414) to pellet the mitochondria. The supernatant was then centrifuged at 100 000g for 1 h at 4 °C (Beckman TL-100 ultracentrifuge) to pellet the host cell membranes. The pellet was retained, capped with  $N_2$  gas, frozen at -80 °C and analyzed within 72 h.

To generate the electron paramagnetic resonance (EPR) spectrum, the membranes were thawed, and 0.1  $\mu\text{mol l}^{-1}$  2,2,6,6-tetramethylpiperidine-1-oxyl (TEMPO) was added in proportion to the amount of host cell membrane phospholipid. Phospholipid concentration was determined from the phosphorus content (Bartlett, 1959). The EPR spectrum was measured with a Varian E-109 EPR spectrophotometer (Varian Associates, Inc., Palo Alto, CA, USA) operating at X-band and fitted with a two-loop one-gap resonator (Hubbell et al., 1987). Measurements were made approximately every 5 °C from 0 to 40 °C. Temperature was controlled with a Varian nitrogen gas flow system and monitored with a thermocouple inserted into the resonator. The heights of the lipid and water signals were measured and their ratio calculated at each temperature (as described by McConnell et al., 1972; Shimshick and McConnell, 1973).

### Bioassay for bleaching

Bleaching was evoked with an acute cold shock or heat shock in darkness following the protocol of Muscatine et al. (Muscatine et al., 1991) with some modifications. Cold shock gives bleaching results similar to those obtained with heat shock, but takes less time, so that results can be obtained within 17 h. Briefly, the anemones were held in 10 ml test tubes in 2 ml of Millipore-filtered sea water (MFSW) during the experiment. All experiments contained at least two sets of controls; one consisted of animals held at 25 °C in MFSW during the entire experiment. The second consisted of anemones that had been cold-shocked for 2.5 h at 12 °C in a water bath (Neslab model RT#110), then returned to 25 °C and allowed to release host cells containing symbiotic algae. After incubation for 14 h at 25 °C, the number of algae released was determined and expressed as a percentage of the total number of symbiotic dinoflagellates in the anemone. Algal cell number was determined either with a hemocytometer (Hausser Scientific) or with a cell imaging system. An image of the cells loaded on the hemocytometer was captured with a Sony (model DC-37) CCD video camera and stored on an IBM-PC-XT. The image was simultaneously displayed on a Sony Triniton monitor. Image analysis (i.e.

cell counts) was performed with Olympus CUE-2 image-analysis software.

### Pharmacology

Different pharmacological agents were used to evoke host cell detachment in *A. pulchella* at 25 °C. Some of these agents were dissolved in dimethylsulfoxide (DMSO), so we initially employed a DMSO control. In no case did incubation with a DMSO control cause release beyond that of the MFSW control at 25 °C, and the DMSO control was omitted in subsequent experiments.

Anemones treated with a pharmacological agent were held in that agent for 2.5 h at either 25 or 12 °C, then rinsed and transferred to MFSW at 25 °C. After 14 h, the percentage of cells released was determined.

The following pharmacological agents were employed: A23187, trifluoperazine (TFP), W-7 [*N*-(6-aminohexyl)-5-chloro-1-naphthalene-sulfonamide,HCl] (Calbiochem), NiCl<sub>2</sub> (Mallinckrodt), CoCl<sub>2</sub>·6H<sub>2</sub>O (Baker), 1,2-bis(*o*-amino-5-bromophenoxy)ethane-*N,N,N,N'*-tetraacetic acid, sodium (BAPTA, dibromo-AM) (Molecular Probes), caffeine, procaine (Sigma), nimodipine, verapamil (gifts from Dr P. O'Lague), ryanodine, 2,5-di(+)(butyl)-hydroquinone (DTBHQ) (gifts from Dr M. Barish), ionomycin, thapsigargin (Calbiochem), okadaic acid, phorbol,12-myristate,13-acetate (PMA), isobutylmethylxanthine (IBMX) (Calbiochem) and ortho-sodium vanadate (Na<sub>3</sub>VO<sub>4</sub>) (Fisher). All agents were dissolved in MFSW except for A23187, ionomycin, BAPTA, DTBHQ, okadaic acid and PMA, which were dissolved in DMSO.

### Identification of the product of release

The product released from *A. pulchella* (i.e. isolated algae; algae within host cells) was determined by incubating the anemones in the test solution with poly-L-lysine-coated coverslips (0.1 % in distilled water,  $M_r > 70 \times 10^3$ , Sigma). After bleaching had been induced and cell products had been released, the coverslips were removed and the nature of the released product was determined. Briefly, the coverslips were rinsed with FSW and stained either with 0.01 % fluorescein diacetate (Sigma) for 20 min for detection of host cell cytoplasm or with 0.01 % Hoechst 33258 (Sigma) for 5 min for detection of host cell nuclei (Gates et al., 1992). After staining, the coverslips were rinsed with FSW, mounted on slides and viewed on an Olympus BX-40 epifluorescence microscope.

### Imaging intracellular Ca<sup>2+</sup>

The concentration of Ca<sup>2+</sup> in isolated host endoderm cells was determined by quantitative analysis of the fluorescence image of the Ca<sup>2+</sup>-specific fluorochrome Fura-2AM (Calbiochem). Endodermal cells were isolated from *A. pulchella* using the trypsin maceration technique of Gates and Muscatine (Gates and Muscatine, 1992). Following maceration, endodermal cells were concentrated on coverslips coated either with poly-L-lysine (0.1 % in deionized water;

$M_r > 70 \times 10^3$ , Sigma) or concanavalin A (10 mg ml<sup>-1</sup>, Sigma Type 5). Cells were then incubated for 1 h in 5 μmol l<sup>-1</sup> Fura-2AM in FSW prepared from a stock solution of 10<sup>-3</sup> mol l<sup>-1</sup> Fura-2AM dissolved in DMSO. The cells were then rinsed three times with MFSW, and the color was allowed to develop for 30 min to 1 h before imaging.

The fluorescence image of [Ca<sup>2+</sup>]<sub>i</sub> was obtained with a computer-assisted image-analysis system for the quantification of Fura-2AM fluorescence, as described by Sanderson et al. (Sanderson et al., 1990) and Charles et al. (Charles et al., 1991). Briefly, isolated cells were observed with a Nikon Diaphot microscope with a 40× oil-immersion objective (n.a. 1.3). Fluorescent video images, captured with a modified silicon-intensifier target (SIT) video camera (Cohu, San Diego, CA, USA), were recorded on an optical memory disk recorder (Panasonic TQ2026F). Maps of [Ca<sup>2+</sup>]<sub>i</sub> were constructed by substituting the 340/380 image ratio (pixel by pixel) and changes in fluorescence at 380 nm into modified equations derived from those of Grynkiewicz et al. (Grynkiewicz et al., 1985) and Monck et al. (Monck et al., 1988). Images consisted of an average of five frames recorded at 340 and 380 nm. A thermal stage fitted with a Peltier device permitted investigation of the change in fluorescence of isolated host cells as a function of temperature over the range 12–35 °C.

### <sup>45</sup>Ca measurements

Changes in [Ca<sup>2+</sup>]<sub>i</sub> during cold shock were also measured using <sup>45</sup>Ca. Two different experiments were performed; in the first, anemones were preincubated for 24 h in 2 ml of MFSW containing <sup>45</sup>CaCl<sub>2</sub> (3.7 × 10<sup>4</sup> Bq ml<sup>-1</sup>) (gift of Dr E. Gonzalez). The anemones were then rinsed with MFSW and either cold-shocked at 12 °C or held at 25 °C in 2 ml of MFSW for 2 h. In the second experiment, anemones were incubated in 2 ml of MFSW containing <sup>45</sup>Ca (7.4 × 10<sup>4</sup> Bq ml<sup>-1</sup>) during the 2 h experiment. In both experiments, replicate 100 μl water samples were removed every 15 min throughout the 2 h incubation. At the end of the experiment, the anemones were homogenized in 1 ml of MFSW to separate the algae from the animal tissue. The homogenate was centrifuged at 500 *g* for 4 min (Damon/IEC model HN-S) to pellet the symbiotic algae. The supernatant containing the animal homogenate was removed, and replicate 100 μl samples were taken for counting in a LKB RackBeta scintillation counter (Bio Safe II scintillation cocktail). Samples (100 μl) were also taken for determination of animal protein concentration, and the amount of <sup>45</sup>Ca in the anemone was expressed as disintegrations min<sup>-1</sup> mg<sup>-1</sup> soluble protein.

### Determination of cyclic AMP concentration

The anemones (*N*=4) were heat-shocked for 16 h at 30 °C, cold-shocked for 2.5 h at 12 °C, incubated in 25 mmol l<sup>-1</sup> caffeine for 2.5 h at 25 °C or held at 25 °C for 2.5 h in 2 ml of FSW. After the treatment, the anemones were quickly rinsed in FSW, blotted on weighing paper, placed in a 1.5 ml microfuge tube, flash-frozen in liquid nitrogen and then

homogenized in 1 ml of 6% trichloroacetic acid. The homogenate was centrifuged at 500g for 4 min (Damon/IEC, model HN-S) to pellet the symbiotic algae. The supernatant was retained for use in the cyclic AMP (cAMP) assay using the Biotrak cAMP enzyme immunoassay system (Amersham). The pellet was retained for protein determination. The results are expressed as fmol cAMP mg<sup>-1</sup> protein.

#### Labeling proteins with <sup>32</sup>P

To label anemone proteins with <sup>32</sup>P-labeled orthophosphate (1 mCi; 3.7×10<sup>7</sup> Bq ml<sup>-1</sup>, Amersham), the anemones were rinsed three times in phosphate-free artificial sea water (ASW), placed in 1 ml of phosphate-free ASW and briefly allowed to expand. The anemones were then irrigated with 100 μCi (3.7×10<sup>6</sup>) Bq ml<sup>-1</sup> of <sup>32</sup>P and incubated for 4 h in the dark at 12, 25 or 30 °C or incubated in 10 mmol l<sup>-1</sup> caffeine at 25 °C. After incubation, the anemones were homogenized in a low-salt buffer (40 mmol l<sup>-1</sup> Tris, 10 mmol l<sup>-1</sup> EDTA, 1 mmol l<sup>-1</sup> phenylmethylsulfonyl fluoride (PMSF, 10 mmol l<sup>-1</sup> NaF, 2 mmol l<sup>-1</sup> EGTA and 1 mmol l<sup>-1</sup> vanadate) containing 1 μg ml<sup>-1</sup> of the protease inhibitors pepstatin, leupeptin and chymostatin (Sigma). The homogenate was centrifuged at 500g for 4 min (Damon/IEC model HN-S) to pellet the symbiotic algae, and the supernatant was retained for protein determination and determination of radioactivity (10 μl samples were counted in a LKB RackBeta scintillation counter; Bio Sage II scintillation cocktail).

#### Two-dimensional electrophoresis

Two-dimensional electrophoresis was performed with a Pharmacia Biotech Multiphor II apparatus following the manufacturer's instructions. An equal number of counts of <sup>32</sup>P was loaded on the immobiline DryStrips (pH 3–10, Pharmacia Biotech) for the isoelectric focusing dimension. When the second dimension (gel electrophoresis) was finished, the gels (Excel Gel SDS, gradient 8-18, Pharmacia Biotech) were dried and autoradiographed on X-ray film for 14 days. Broad-range standards (BioRad) were used for molecular mass determination. The autoradiographs were scanned into Adobe PhotoShop, the images were colored and landmark proteins were superimposed to assist in determining which proteins were unique to each treatment.

#### Protein measurements

The soluble protein concentration of the anemone homogenate was determined by the method of Bradford (Bradford, 1976) or using the DC Protein Assay (BioRad). In addition, any protein released into the medium by cold-shocked aposymbiotic anemones was also determined by the Bradford method.

#### Statistical analyses

The mean and standard deviation of the mean (S.D.) were calculated for the data. In addition, significant differences between treatments were determined either by *t*-test or by analysis of variance (ANOVA) using the program Statview.

## Results

### Electron paramagnetic resonance measurements of membrane fluidity

To determine whether there was a phase transition in isolated host cell plasma membranes from *A. pulchella* and *P. damicornis* in response to temperature stress, we measured the EPR signal in isolated membranes from *A. pulchella* and from *P. damicornis* labeled with 0.1 μmol l<sup>-1</sup> TEMPO. The transformed data from animal plasma membranes from *A. pulchella* labeled with the spin probe TEMPO yield a linear relationship from 0 to 40 °C (Fig. 1). As the membrane preparation from *P. damicornis* consistently reduced the spin probe and the unknown reducing agent was not responsive to addition of 5 mmol l<sup>-1</sup> ferric cyanide, measurements were limited to temperatures from 0 to 15 °C (Fig. 1). These data also yield a linear relationship (*r*<sup>2</sup>=0.98 for each) indicating no membrane phase transition in plasma membranes from either *A. pulchella* or *P. damicornis* (Fig. 1).

### The effects on intact animals of pharmacological agents that perturb [Ca<sup>2+</sup>]<sub>i</sub>

We tested the possibility that [Ca<sup>2+</sup>]<sub>i</sub> could be altered by temperature stress by applying pharmacological agents to intact animals at 25 °C and observing the effect on release of host cells. These results were compared with results obtained from anemones held at their growth temperature (25 °C) and with results from cold-shocked anemones (12 °C). The results of treatment of the anemones with pharmacological agents are summarized in Table 1. To determine whether cold shock evoked entry of Ca<sup>2+</sup> through Ca<sup>2+</sup> channels, we treated intact anemones before and during cold shock with the Ca<sup>2+</sup> channel blockers nimodipine, verapamil, Ni<sup>2+</sup> and Co<sup>2+</sup>. None of these agents prevented release of host cells. Next, we treated intact anemones at 25 °C with the Ca<sup>2+</sup> ionophores A23187 and ionomycin. Neither caused a significant release of host cells, nor did the calmodulin antagonists W-7 and TFP (Uyeda and Furuya, 1986).

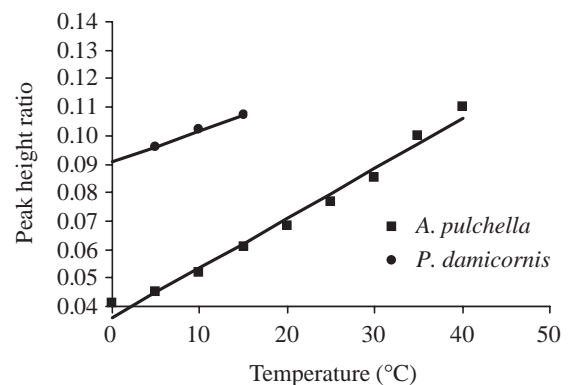

Fig. 1. Peak height ratio (height of the lipid signal/height of the water signal) of the electron paramagnetic resonance spectrum generated from membranes from *Aiptasia pulchella* and *Pocillopora damicornis* and labeled with 0.1 μmol l<sup>-1</sup> TEMPO over the temperature range 0–40 °C. *r*<sup>2</sup>=0.98 for each.

Table 1. The ability of various pharmacological agents to evoke host cell detachment in *Aiptasia pulchella*

| Agent                                         | Concentration range (mol l <sup>-1</sup> ) | Added during cold shock | Effect                                  |
|-----------------------------------------------|--------------------------------------------|-------------------------|-----------------------------------------|
| <b>Ca<sup>2+</sup> channel blockers</b>       |                                            |                         |                                         |
| Nimodipine                                    | 10 <sup>-7</sup> to 10 <sup>-6</sup>       | Yes                     | Release not prevented ( <i>P</i> =0.42) |
| Verapamil                                     | 10 <sup>-7</sup> to 10 <sup>-5</sup>       | Yes                     | Release not prevented ( <i>P</i> =0.31) |
| Ni <sup>2+</sup>                              | 10 <sup>-5</sup> to 10 <sup>-3</sup>       | Yes                     | Release not prevented ( <i>P</i> =0.19) |
| Co <sup>2+</sup>                              | 5×10 <sup>-4</sup> to 5×10 <sup>-2</sup>   | Yes                     | Release not prevented ( <i>P</i> =0.24) |
| <b>Ca<sup>2+</sup> ionophores</b>             |                                            |                         |                                         |
| A23187                                        | 10 <sup>-7</sup> to 10 <sup>-5</sup>       | No                      | No release ( <i>P</i> =0.45)            |
| Ionomycin                                     | 10 <sup>-7</sup> to 10 <sup>-5</sup>       | No                      | No release ( <i>P</i> =0.70)            |
| <b>Second messenger-pathway agents</b>        |                                            |                         |                                         |
| W-7                                           | 10 <sup>-6</sup> to 10 <sup>-5</sup>       | No                      | No release ( <i>P</i> =0.93)            |
| TFP                                           | 10 <sup>-7</sup> to 10 <sup>-5</sup>       | No                      | No release ( <i>P</i> =0.25)            |
| <b>Ca<sup>2+</sup>-ATPase inhibitors</b>      |                                            |                         |                                         |
| Thapsigargin                                  | 10 <sup>-8</sup> to 10 <sup>-6</sup>       | No                      | No release ( <i>P</i> =0.54)            |
| DTBHQ                                         | 10 <sup>-6</sup> to 10 <sup>-4</sup>       | No                      | No release ( <i>P</i> =0.92)            |
| <b>Ca<sup>2+</sup> store releasing agents</b> |                                            |                         |                                         |
| Caffeine                                      | 10 <sup>-5</sup> to 2.5×10 <sup>-2</sup>   | No                      | Caused release ( <i>P</i> =0.01)        |
| Ryanodine                                     | 10 <sup>-5</sup> to 3×10 <sup>-4</sup>     | No                      | Release not prevented ( <i>P</i> =0.33) |
| Procaine                                      | 10 <sup>-5</sup> to 3×10 <sup>-3</sup>     | Yes                     | Release not prevented ( <i>P</i> =0.42) |
| <b>Ca<sup>2+</sup> chelator</b>               |                                            |                         |                                         |
| BAPTA                                         | 10 <sup>-5</sup> to 10 <sup>-3</sup>       | Yes                     | Release not prevented ( <i>P</i> =0.82) |

To determine whether cold shock evoked release of Ca<sup>2+</sup> from intracellular stores, we used the Ca<sup>2+</sup>-ATPase inhibitors thapsigargin and DTBHQ (Moore et al., 1987; Kass et al., 1989; Thastrup et al., 1989; Thastrup, 1990; Thastrup et al., 1990; Holliday et al., 1991; Lytton et al., 1991). Neither thapsigargin nor DTBHQ caused a significant release of host cells.

We then tested the effect of caffeine, which causes the

release of Ca<sup>2+</sup> from intracellular stores (Uyeda and Furuya, 1986; Klein et al., 1992; Lee, 1993). Fig. 2 shows that 10 mmol l<sup>-1</sup> caffeine evokes release of symbiotic algae at 25 °C, and at 25 mmol l<sup>-1</sup> the percentage release is equal to that of the cold-shock control (*P*<0.01). Moreover, the longer the anemones are exposed to caffeine, the more cells are released (Fig. 3). In addition, caffeine evokes the release of entire host cells

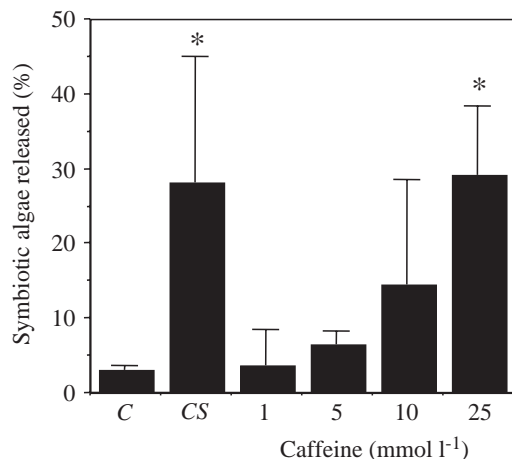

Fig. 2. The effect of a 2.5 h treatment with different concentrations of caffeine on release of symbiotic algae from *Aiptasia pulchella*. The control (C) anemones were held at 25 °C, while the cold-shocked anemones (CS) were held at 12 °C for 2.5 h. Cell release is expressed as a percentage of the total number of symbiotic dinoflagellates in the anemone [(released/released+retained)×100] released into the medium. Values are means + S.E.M., *N*=15 in each condition. \*Significantly different from the control value, *P*≤0.01.

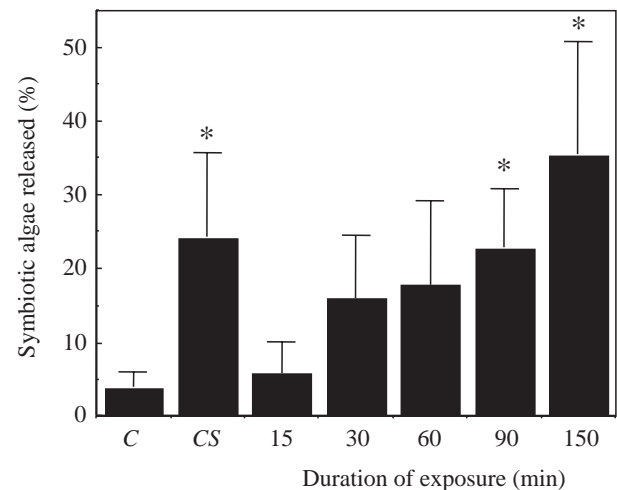

Fig. 3. The effect of varying the duration of exposure to 25 mmol l<sup>-1</sup> caffeine on release of symbiotic algae from *Aiptasia pulchella*. The control anemones (C) were held at 25 °C, while the cold-shocked anemones (CS) were held at 12 °C for 2.5 h. Cell release is expressed as a percentage of the total number of symbiotic dinoflagellates in the anemone [(released/released+retained)×100] released into the medium. Values are means + S.E.M., *N*=5 in each condition. \*Significantly different from the control value, *P*≤0.01.

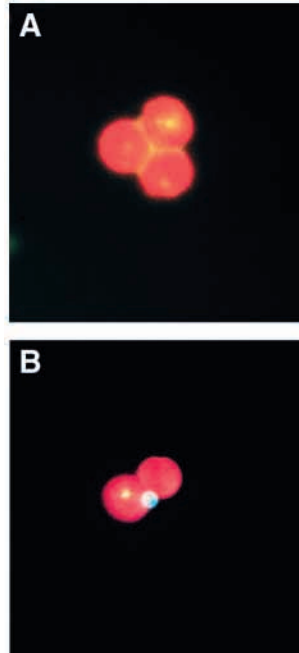

Fig. 4. Photomicrographs of the product of release from *Aiptasia pulchella* after treatment with  $25 \text{ mmol l}^{-1}$  caffeine. In A, the product was stained with 0.01% fluorescein diacetate ( $\times 4000$ ). Host cell cytoplasm is visible at the interstices of the algae; in B, the product was stained 0.01% Hoechst 33258 ( $\times 4000$ ). The host cell nucleus is visible adjacent to the algal doublet.

containing the endosymbiotic algae (Fig. 4). When the cells released from anemones treated with  $25 \text{ mmol l}^{-1}$  caffeine are stained with fluorescein diacetate, the esterases in the host cell cytoplasm cleave the dye to its active state (Fig. 4A). The host cell cytoplasm is revealed as yellow fluorescence in the interstices between the red fluorescent algae. When the released cells are stained with the DNA-specific dye Hoechst 33258, the host cell nucleus can be seen adjacent to the algal doublet (Fig. 4B), with the algae occupying most of the interior of the host cell. This unusual architecture is described in detail elsewhere (Gates et al., 1992). Finally, aposymbiotic anemones treated with caffeine tended to release more protein to the surrounding sea water than the  $25^\circ\text{C}$  controls, although

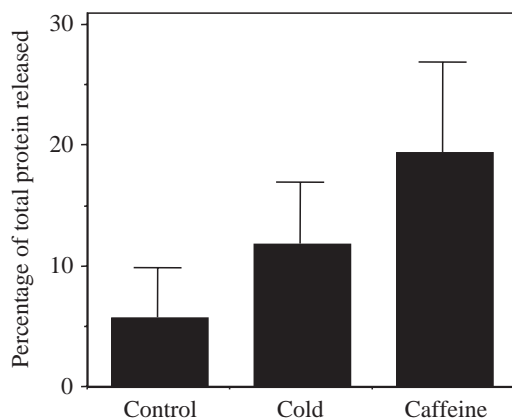

Fig. 5. The effect of a 2.5 h treatment with  $25 \text{ mmol l}^{-1}$  caffeine on the percentage of total protein released from aposymbiotic *Aiptasia pulchella*. The control anemones were held at  $25^\circ\text{C}$ , while the cold-shocked anemones were held at  $12^\circ\text{C}$  for 2.5 h. Values are means + S.E.M.,  $N=6$  in each condition.

this difference was not statistically significant (Fig. 5,  $P < 0.094$ ). Increased protein release is interpreted as the result of release and subsequent disintegration of endodermal cells.

Because caffeine releases  $\text{Ca}^{2+}$  from ryanodine-sensitive stores (Uyeda and Furuya, 1986; Klein et al., 1992; Lee, 1993), we tested whether ryanodine could block the caffeine-induced release of cells. Ryanodine was not able to block the caffeine-induced release of cells ( $P=0.33$ ). Cell release from anemones cold-shocked in the presence of procaine, which can block  $\text{Ca}^{2+}$  release from caffeine-sensitive stores (Kitamura et al., 1986; Klein et al., 1992), was also not affected ( $P=0.42$ ) (Table 1).

Finally, to test generally whether  $\text{Ca}^{2+}$  is involved, we added the  $\text{Ca}^{2+}$  chelator BAPTA during cold shock. BAPTA binds  $\text{Ca}^{2+}$  before it can exert a physiological effect (Dubinsky, 1993; Snow and Nuccitelli, 1993), and BAPTA did not prevent the release of host cells evoked by cold shock ( $P=0.82$ ) (Table 1).

#### Observation of isolated host cells by $\text{Ca}^{2+}$ imaging

To gain further insight into the role of caffeine in evoking host cell release, we used the  $\text{Ca}^{2+}$ -sensitive fluorochrome Fura-2AM to monitor  $[\text{Ca}^{2+}]_i$  in isolated host cells during the application of selected pharmacological agents. Addition of ionomycin, which does not cause bleaching in *A. pulchella*, increased  $[\text{Ca}^{2+}]_i$  from the resting level of  $68 \pm 30$  to  $570.0 \pm 191.4 \text{ nmol l}^{-1}$  within 60 s of its application to isolated host cells (Fig. 6). In contrast, 12 min after the addition of caffeine,  $[\text{Ca}^{2+}]_i$  was  $114.7 \pm 61.5 \text{ nmol l}^{-1}$  (Fig. 6). These data provide direct evidence that caffeine, while able to induce bleaching in *A. pulchella*, does not cause an increase in  $[\text{Ca}^{2+}]_i$  in isolated host cells from *A. pulchella*.

Attempts to measure  $[\text{Ca}^{2+}]_i$  as a function of temperature were thwarted because the fluorescence of Fura-2AM itself is temperature-sensitive (Fig. 7). Any change in  $[\text{Ca}^{2+}]_i$  we

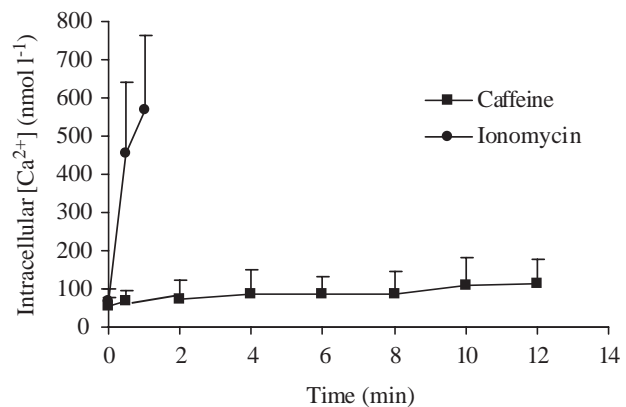

Fig. 6. The intracellular  $\text{Ca}^{2+}$  concentration in isolated host cells from *Aiptasia pulchella* treated with either  $10^{-6} \text{ mol l}^{-1}$  ionomycin or  $25 \text{ mmol l}^{-1}$  caffeine.  $\text{Ca}^{2+}$  values were obtained from computer analysis of stored images of cells labeled with Fura-2AM. Values are means + S.E.M.,  $N=20$  for ionomycin-treated cells;  $N=12$  for caffeine-treated cells.

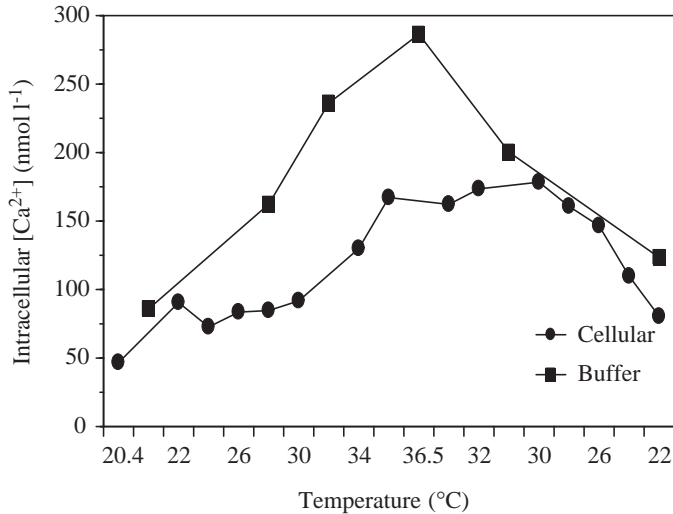

Fig. 7. The intracellular  $\text{Ca}^{2+}$  concentration in isolated host cells ( $N=30$ ) from *Aiptasia pulchella* and the  $\text{Ca}^{2+}$  concentration of a buffer containing  $150\ \mu\text{mol l}^{-1}$   $\text{Ca}^{2+}$  obtained by  $\text{Ca}^{2+}$  imaging using the dye Fura-2AM during temperature stress. The cells were subjected to a temperature stress from 20.4 to 36 °C and back to 22 °C, while the buffer was subjected to a temperature change from 21.6 to 36.5 °C and back to 22 °C.

observed in isolated host cells was within the temperature-sensitive curve for Fura-2AM.

#### <sup>45</sup>Ca measurements on intact animals

Using the dye Fura-2AM, we were able to image  $\text{Ca}^{2+}$  fluxes only over periods of 15 min or less because of quenching of the fluorescence. We used <sup>45</sup>Ca to investigate  $\text{Ca}^{2+}$  fluxes over longer periods. In anemones incubated in <sup>45</sup>Ca during cold shock, the flux of <sup>45</sup>Ca into the anemones did not differ from that of the control anemones. In the control animals, there was a 3.5% decrease in  $[\text{Ca}^{2+}]$ , while in the cold-shocked anemones there was a 4% decrease. In addition, the total amount of <sup>45</sup>Ca in the cold-shocked anemones (animal tissue) was  $5.7 \times 10^5 \pm 5.5 \times 10^5$  disintegrations  $\text{min}^{-1}$ , which is not significantly different from that in the control anemones ( $3.4 \times 10^5 \pm 2.1 \times 10^5$  disintegrations  $\text{min}^{-1}$ ;  $P=0.28$ ; unpaired  $t$ -test). In anemones preincubated in <sup>45</sup>Ca, there was no difference between control and cold-shocked anemones either in release of  $\text{Ca}^{2+}$  or in the amount of  $\text{Ca}^{2+}$  in the anemones at the end of the cold shock (data not shown).

#### Measurement of cAMP concentration

Caffeine can affect protein phosphodiesterase activity as well as intracellular  $\text{Ca}^{2+}$  levels, so we next tested whether caffeine induced host cell detachment in the sea anemone *A. pulchella* by inhibiting phosphodiesterases, leading to an increase in the concentration of cAMP. The cAMP concentration in the animal homogenate was measured after a 2.5 h incubation in  $25\ \text{mmol l}^{-1}$  caffeine and compared with the cAMP concentration in control anemones held at 25 °C, their growth temperature. Fig. 8 shows that caffeine induced an

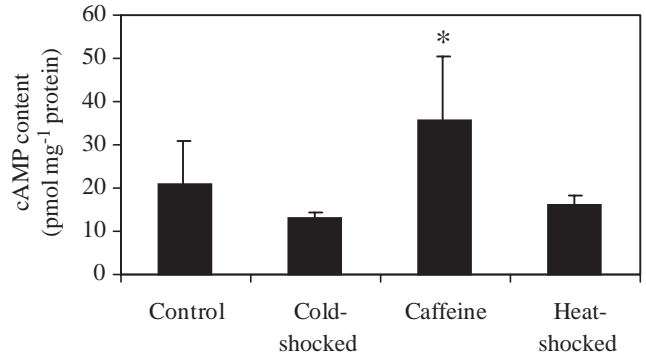

Fig. 8. The amount of cAMP ( $\text{pmol mg}^{-1}$  protein) in the sea anemone *Aiptasia pulchella* cold-shocked at 12 °C, held at 25 °C (Control), incubated in  $25\ \text{mmol l}^{-1}$  caffeine at 25 °C for 2.5 h or heat-shocked at 30 °C for 14 h. Values are means + S.E.M.,  $N=4$ . \*Significantly different from the control value,  $P \leq 0.05$ .

increase in cAMP concentration compared with the control ( $P < 0.05$ ). To test whether temperature shock acted like caffeine and increased cAMP concentration, anemones were either heat-shocked (30 °C) nor cold-shocked (12 °C), and the cAMP concentration in the animal homogenate was assessed and compared with the cAMP concentration in control anemones. Fig. 8 shows that neither heat shock nor cold shock increased cAMP concentration compared with the control. Both the cold- and heat-shocked anemones had a lower intracellular concentration of cAMP than did the controls, although these differences were not statistically significant ( $P=0.38$ ). This suggests that cAMP is not involved in the induction of host cell detachment by thermal stress.

#### The effects of pharmacological agents that affect protein phosphorylation in intact anemones

Caffeine, which increases cAMP concentrations by inhibiting phosphodiesterases, has a general effect on intracellular protein phosphorylation. We exposed *A. pulchella* to other pharmacological agents that affect protein phosphorylation (Table 2). IBMX, a phosphodiesterase inhibitor, had no effect on cell release from *A. pulchella* ( $P=0.90$ ), nor did the protein kinase C activator PMA ( $P=0.79$ ).

Table 2. The effects of pharmacological agents on cell host release from the sea anemone *Aiptasia pulchella*

| Agent                       | Concentration ( $\text{mol l}^{-1}$ ) | Result                       |
|-----------------------------|---------------------------------------|------------------------------|
| Phosphodiesterase inhibitor |                                       |                              |
| Isobutylmethylxanthine      | $10^{-6}$ to $10^{-3}$                | No release ( $P=0.90$ )      |
| Protein kinase C activator  |                                       |                              |
| Phorbol ester (PMA)         | $10^{-10}$ to $10^{-7}$               | No release ( $P=0.79$ )      |
| Phosphatase inhibitors      |                                       |                              |
| Okadaic acid                | $10^{-7}$ to $10^{-6}$                | No release ( $P=0.42$ )      |
| Vanadate                    | $10^{-5}$ to $10^{-3}$                | Caused release ( $P=0.004$ ) |

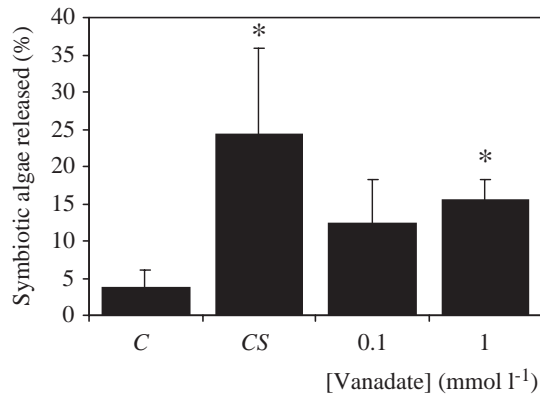

Fig. 9. The effect of a 2.5 h treatment with two concentrations of vanadate on the release of symbiotic algae from *Aiptasia pulchella*. The control anemones (C) were held at 25 °C, while the cold-shocked anemones (CS) were held at 12 °C for 2.5 h. Cell release is expressed as a percentage of the total number of symbiotic dinoflagellates in the anemone [(released/released+retained)×100] released into the medium. Values are means + S.E.M.,  $N=4$  in each condition. \*Significantly different from the control value,  $P \leq 0.0004$ .

Of the two phosphatase inhibitors tested, okadaic acid did not affect release of cells ( $P=0.42$ ), but 1 mmol l<sup>-1</sup> vanadate caused release of  $15.5 \pm 2.7\%$  ( $P=0.004$ ) of the symbiotic algae (Fig. 9). Higher concentrations of vanadate had no further effect, and vanadate was never as effective as temperature or caffeine in causing release of cells.

#### <sup>32</sup>P-phosphorylated proteins

To test directly whether temperature alters intracellular protein phosphorylation in *A. pulchella*, anemones were held at 25 °C, cold-shocked (12 °C), heat-shocked (30 °C) or incubated in 10 mmol l<sup>-1</sup> caffeine in the presence of <sup>32</sup>P, and the animal protein was extracted and subjected to two-

dimensional gel electrophoresis (Fig. 10). To facilitate comparison among treatments, gels were superimposed using landmark proteins. Although the superimposition was not always perfect, many <sup>32</sup>P-labeled proteins unique to each treatment were easily distinguished.

Comparison of the <sup>32</sup>P-labeled proteins between control and cold-shocked, control and caffeine-treated and cold-shocked and caffeine-treated anemones revealed a number of proteins unique to each treatment (Fig. 10) (Sawyer, 1998). The pattern of protein phosphorylation in the control anemones differs from that in the cold-shocked anemones, and the patterns in both control and cold-shocked anemones differ from that in the caffeine-treated anemones. The protein phosphorylation pattern from the heat-shocked anemones was not determined because of consistently poor incorporation of <sup>32</sup>P by these anemones. The molecular mass of the proteins that differed between the treatments ranged from 5 to 100 kDa (Fig. 10), and the number of unique proteins in the control and cold-shocked anemones ranged from 17 to 34. This is a conservative estimate; because of the slight offset in landmark proteins between gels, the number of unique proteins was deliberately underestimated.

#### Discussion

In the present study, we investigated the mechanism by which increased or decreased temperature causes loss of host cells and results in cnidarian bleaching. We initially tested the hypothesis that increased or decreased temperature induced a membrane thermotropic event in host cell membranes. This thermotropic event would cause an increase in  $[Ca^{2+}]_i$ , and this increase would induce cell adhesion dysfunction of the host cells (Gates et al., 1992). We saw no evidence of a phase transition, as measured by EPR, in isolated host cell membranes from the sea anemone *A. pulchella* and the coral

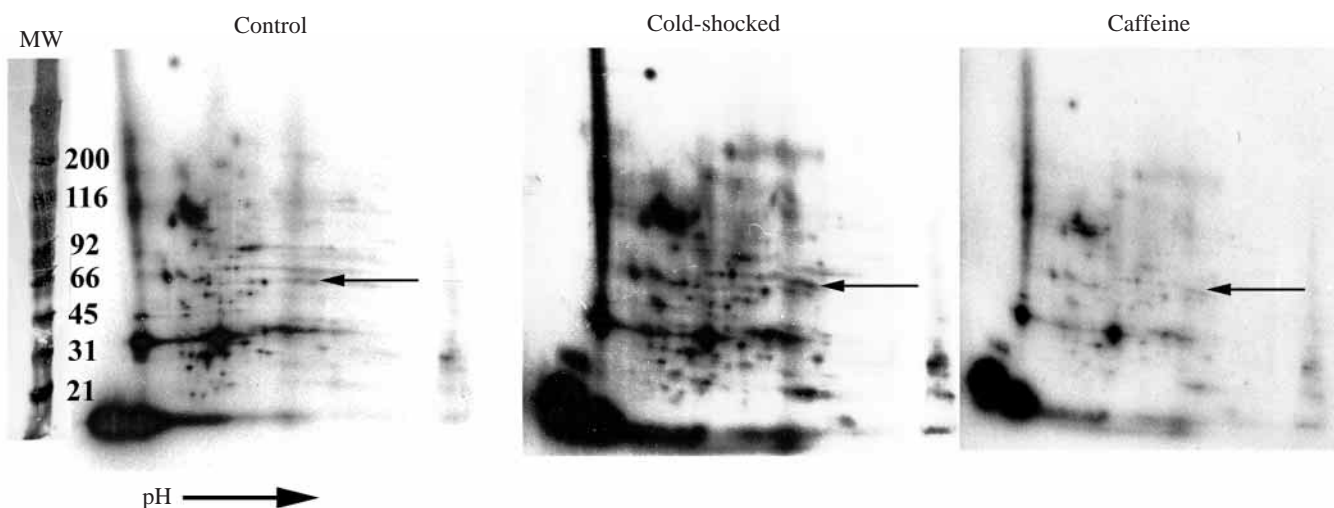

Fig. 10. Autoradiographs of <sup>32</sup>P-phosphorylated proteins separated by two-dimensional gel electrophoresis from the control value anemones held at 25 °C, anemones cold-shocked at 12 °C and anemones treated with 25 mmol l<sup>-1</sup> caffeine for 2.5 h. The arrows point to a group of proteins that are of equal molecular mass (MW) but are differentially phosphorylated.



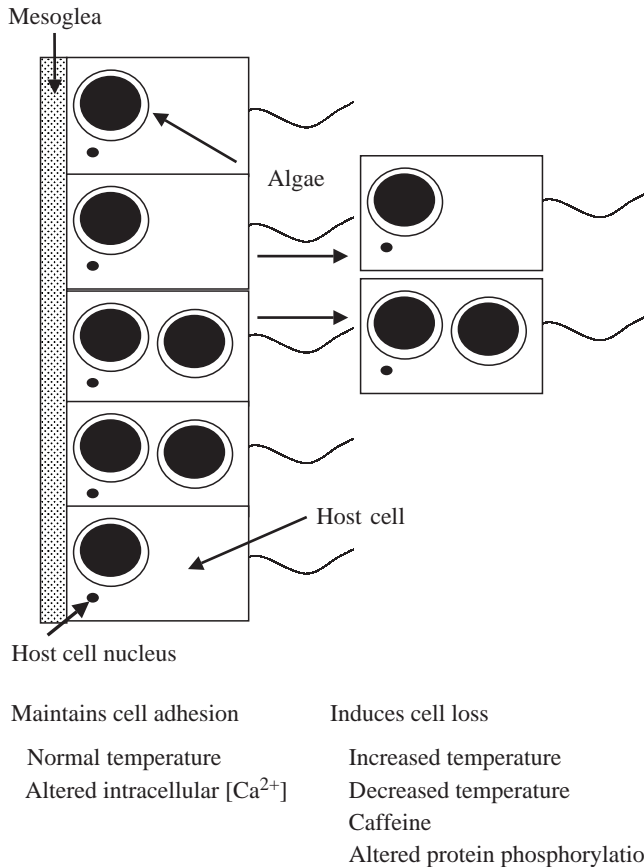

Fig. 11. Schematic representation of how cell adhesion is controlled in the tropical sea anemone *Aiptasia pulchella*, indicating that increased and decreased temperature as well as altered protein phosphorylation induce host cell detachment.

*P. damicornis* over the temperatures measured. Perturbing intracellular  $Ca^{2+}$  stores with pharmacological agents did not affect the bleaching response, and we did not observe an increase in  $[Ca^{2+}]_i$  using either the calcium dye Fura-2AM or  $^{45}Ca$  during temperature shock. Caffeine, which can release  $Ca^{2+}$  from intracellular stores as well as affect protein phosphorylation levels (Uyeda and Furuya, 1986; Klein et al., 1992; Lee, 1993), can cause host cell detachment in *A. pulchella* without affecting  $[Ca^{2+}]_i$ . In addition, vanadate, a protein phosphatase inhibitor, can induce bleaching in *A. pulchella*. Measurement of protein phosphorylation using two-dimensional gel electrophoresis of  $^{32}P$ -labeled proteins demonstrates that cold-shocked, caffeine-treated and control anemones have different levels of phosphorylated host proteins. This suggests that temperature-induced cnidarian bleaching alters the protein phosphorylation of the host and, by this mechanism, induces the loss of host cells (Fig. 11).

#### EPR measurement of membrane fluidity

We tested the hypothesis that temperature-induced host cell detachment in symbiotic cnidarians begins with a membrane thermotropic event. Muscatine et al. (Muscatine et al., 1991) observed a break at 15 °C in the Arrhenius plot of rate of

release of symbiotic dinoflagellates *versus* temperature. We saw no evidence for a membrane phase transition between 0 and 40 °C (Fig. 1) in plasma membranes from *A. pulchella*. Isolated plasma membranes from *P. damicornis* labeled with TEMPO also show no evidence of a membrane phase transition (Fig. 1), although the temperature test range was restricted to 0–15 °C because of the unexplained reduction of the spin probe TEMPO. The addition of ferric cyanide did not halt this reduction, so we conclude that the reduction of the probe was not the result of mitochondrial activity, but of an unknown agent. The absence of a phase change in *P. damicornis* over this limited range of temperature is consistent with similar data from *A. pulchella*.

The absence of a phase transition in our data could be explained in several ways. First, phase transitions in plasma membranes are common only at very low temperatures (Blazyk and Steim, 1972; Quinn, 1988), so we may not have used a low enough temperature; however, 0 °C is below the lethal cold temperature for both *A. pulchella* and *P. damicornis*, so a phase transition at a temperature below that would be ecologically meaningless. In addition, plasma membranes often contain significant amounts of cholesterol, which stabilize membrane fluidity below the gel-to-liquid-crystalline transition temperature (Chapman et al., 1979; Yeagle, 1987). As cholesterol makes up approximately 17% of the lipids in *A. pulchella* (Doino, 1991), it may help to stabilize the membranes during cold shock. Further, temperature-induced phase transitions in membranes have been reported mainly in specialized membranes, such as those from spermatozoa, chloroplasts and mitochondria (Raison et al., 1971; Blazyk and Steim, 1972; Quinn, 1989; Jurado et al., 1991; Ruiz-Sanz et al., 1992; Parks and Lynch, 1992; Drobnis et al., 1993). These specialized membranes contain a higher proportion of protein and also large amounts of specific phospholipids, making them more susceptible to a temperature-induced membrane phase transition (Quinn, 1988; Quinn, 1989). Thus, the absence of a phase transition in plasma membranes from *A. pulchella* and *P. damicornis* is typical of other plasma membranes.

#### The effects on intact animals of pharmacological agents that perturb $[Ca^{2+}]_i$

To determine whether changes in  $[Ca^{2+}]_i$  were involved in temperature-induced host cell detachment in *A. pulchella*, we used a variety of pharmacological agents to alter intracellular  $Ca^{2+}$  pathways. If we could cause host cell detachment with an agent known to affect a  $Ca^{2+}$  pathway, we might gain insight into how temperature causes loss of host cell adhesion. We used six different types of pharmacological agents:  $Ca^{2+}$  channel blockers,  $Ca^{2+}$  ionophores, second-messenger pathway agents,  $Ca^{2+}$ -ATPase inhibitors,  $Ca^{2+}$  chelators and  $Ca^{2+}$  store releasing agents (Table 1). All have been used successfully to implicate  $Ca^{2+}$  involvement in cells as diverse as melanoma metastatic cells to flagellates (Meissner, 1986; Uyeda and Furuya, 1986; Grega et al., 1987; Kass et al., 1989; Thastrup, 1990; D'Ancona et al., 1992; Klein et al., 1992; Dubinsky, 1993; Simasko and Yan, 1993; Snow and Nuccitelli,

1993). In *A. pulchella*, the only pharmacological agent that induced host cell release was caffeine, an agent that can induce  $\text{Ca}^{2+}$  release from stores in the endoplasmic reticulum (Uyeda and Furuya, 1986; Klein et al., 1992; Lee, 1993). The action of caffeine on *A. pulchella* is similar to that of temperature shock in several ways. Increasing concentrations of caffeine increased cell release (Fig. 2) just as more extreme (farther from the growth temperature) temperature shocks increase cell release (Muscatine et al., 1991). In addition, increased exposure time to caffeine increased cell release (Fig. 3) as does increased duration of temperature shock. Caffeine treatment induces release of host cells identical in appearance to those released after temperature shock (see Gates et al., 1992). Finally, aposymbiotic anemones are sensitive to caffeine (Fig. 4) just as they are to acute changes in temperature.

Besides causing  $\text{Ca}^{2+}$  release from the endoplasmic reticulum, caffeine can also inhibit the enzyme phosphodiesterase (Uyeda and Furuya, 1986; Klein et al., 1992; Lee, 1993). To determine caffeine's action on *A. pulchella*, we used two different pharmacological agents, procaine and ryanodine, that can interact with caffeine-induced  $\text{Ca}^{2+}$  release. Procaine can block  $\text{Ca}^{2+}$  release from caffeine-sensitive stores (Kitamura et al., 1986; Klein et al., 1992), but did not affect cell release during cold shock. Ryanodine is capable of blocking  $\text{Ca}^{2+}$  stores opened by caffeine (Meissner, 1986), but did not inhibit caffeine-induced cell release. These data, as well as the failure to see a change in release in response to any of the other  $\text{Ca}^{2+}$  pathway altering agents, call into question whether caffeine is inducing host cell detachment by inducing changes in intracellular  $\text{Ca}^{2+}$  concentrations.

#### *Ca<sup>2+</sup> imaging of isolated host cells*

Using isolated host cells loaded with the intracellular  $\text{Ca}^{2+}$  dye Fura-2AM, we directly investigated the involvement of  $\text{Ca}^{2+}$  in temperature-induced bleaching. Cells treated with ionomycin (Fig. 6) showed a fivefold increase in  $[\text{Ca}^{2+}]_i$  within 30 s, indicating that this is a viable method for measuring  $[\text{Ca}^{2+}]_i$  in isolated host cells, yet ionomycin did not induce bleaching. When cells were treated with  $25 \text{ mmol l}^{-1}$  caffeine, no change in  $[\text{Ca}^{2+}]_i$  was detected (Fig. 6) even after 12 min. This again suggests that caffeine does not act on *A. pulchella* by inducing  $\text{Ca}^{2+}$  release from the endoplasmic reticulum.

We also used Fura-2AM to investigate how temperature affected  $[\text{Ca}^{2+}]_i$ ; however, these results were inconclusive (Fig. 7) because the binding constant of  $\text{Ca}^{2+}$  to the dye is affected by temperature (Groden et al., 1991; Owen, 1991).

Fang et al. (Fang et al., 1997), using Fura-2AM, observed an increase in  $\text{Ca}^{2+}$  concentration in isolated cells from the coral *Acropora grandis* during heat treatment; however, they used cells that did not contain symbiotic algae. Huang et al. (Huang et al., 1998) demonstrated that bleaching in *A. grandis* required intracellular  $\text{Ca}^{2+}$ . Thus, while it is possible that some cell types in corals release  $\text{Ca}^{2+}$  from intracellular stores with heat stress, in our hands, isolated host cells from the sea anemone *A. pulchella* showed no measurable change in  $[\text{Ca}^{2+}]_i$  during temperature stress.

#### *<sup>45</sup>Ca measurements on intact animals*

The duration of  $\text{Ca}^{2+}$  imaging with Fura-2AM is limited because of quenching of  $\text{Ca}^{2+}$  fluorescence, so we used  $^{45}\text{Ca}$  to investigate long-term fluxes of  $\text{Ca}^{2+}$  in cold-shocked anemones.  $^{45}\text{Ca}$  has been used successfully to evaluate  $\text{Ca}^{2+}$  fluxes in both sea anemones and corals (Tambutte et al., 1995; Allemand and Benazet-Tambutte, 1996; Benazet-Tambutte et al., 1996). When anemones were incubated in  $^{45}\text{Ca}$ , to load  $\text{Ca}^{2+}$  stores with isotope, and then cold-shocked, release of  $^{45}\text{Ca}$  by the cold-shocked anemones did not differ from that of control anemones. In addition, when anemones were cold-shocked in the presence  $^{45}\text{Ca}$  to test for uptake of  $\text{Ca}^{2+}$ , no difference between control and cold-shocked anemones was detected. These data suggest that temperature shock (either warm or cold) does not induce an alteration in intracellular  $\text{Ca}^{2+}$  levels.

#### *Measurement of cAMP*

Temperature shock induces host cell detachment, i.e. bleaching, in the sea anemone *A. pulchella* by an unknown mechanism. Caffeine can also induce host cell detachment in this anemone, suggesting that caffeine and temperature may act on cell adhesion at a common locus. Inhibition of phosphodiesterase activity by caffeine can increase the concentration of cAMP, which can induce loss of cell adhesion in various mammalian cells (Hsieh and Puck, 1971; Ortiz et al., 1973; Steinbach and Schubert, 1975; Miller et al., 1976; Li et al., 1977; Spruill et al., 1981; Kreisberg and Venkatachalam, 1986; Lamb et al., 1988; Glass and Kreisberg, 1993). Thus, temperature and caffeine could induce host cell detachment in *A. pulchella* by causing an increase in cAMP concentration. However, the data in Fig. 8 show that an increase in cAMP concentration in *A. pulchella* is evoked by caffeine, but not by heat or cold shock, suggesting that the modes of action of caffeine and temperature stress in causing cnidarian bleaching differ.

#### *The effects on intact anemones of pharmacological agents that affect protein phosphorylation*

An increased cAMP concentration induced by caffeine would stimulate protein kinase A activity and alter protein phosphorylation. Caffeine can enhance the tyrosine phosphorylation of proteins in cell culture (Aharoni et al., 1993). As phosphorylation of cell adhesion molecules controls adhesion (Volberg et al., 1991; Eriksson et al., 1992; Matsuyoshi et al., 1992; Romer et al., 1992; Volberg et al., 1992; Behrens et al., 1993; Hamaguchi et al., 1993) and phosphorylation of proteins is temperature-sensitive (Maher and Pasquale, 1989; Keyse and Emslie, 1992), temperature and caffeine may both act by altering the phosphorylation of cell adhesion proteins.

The pharmacological agent IBMX was unable to induce release of cells from *A. pulchella* (Table 2). IBMX, like caffeine, is a phosphodiesterase inhibitor, but the two agents have different potencies. IBMX may be more effective at evoking  $\text{Ca}^{2+}$  release from intracellular stores than inhibiting

phosphodiesterase (Ishitani et al., 1995; Usachev and Verkhatsky, 1995), while caffeine may be a better phosphodiesterase inhibitor. The protein phosphatase inhibitor vanadate did induce release of cells (Fig. 9), while okadaic acid and PMA did not (Table 2). Vanadate is an inhibitor of tyrosine phosphatase, while both okadaic acid and PMA affect serine/threonine phosphorylation (Brautigan, 1992; Matsuyoshi et al., 1992; Walter and Mumby, 1993; Tsunoda, 1993). Thus, it is possible that vanadate and caffeine (Aharoni et al., 1993) can induce algal cell loss from *A. pulchella* by affecting tyrosine phosphorylation levels.

#### Patterns of $^{32}\text{P}$ protein phosphorylation

The pattern of incorporation of  $^{32}\text{P}$  into proteins is different in cold-shocked and control anemones as determined by two-dimensional gel electrophoresis. This difference supports the hypothesis that temperature-induced host cell detachment results from altered protein phosphorylation. In addition, the labeling patterns of the  $^{32}\text{P}$ -labeled proteins in the two-dimensional gels from the caffeine-treated anemones are different from those from control anemones, supporting the hypothesis that caffeine can affect the phosphorylation of protein. However, the pattern of  $^{32}\text{P}$ -labeled proteins in the two-dimensional gels of the cold-shocked anemones is not the same as that obtained from the caffeine-treated anemones. This suggests that, while caffeine may induce host cell detachment by altering the phosphorylation of proteins, it may affect different proteins from those affected by temperature shock. On the basis of the pharmacological studies and the patterns of protein phosphorylation revealed by two-dimensional gel electrophoresis, it is clear that temperature-induced host cell detachment in *A. pulchella* is correlated with altered protein phosphorylation. It is not known which proteins are differentially phosphorylated during temperature shock in *A. pulchella*.

We were unable to resolve phosphorylated proteins in heat-shocked anemones because incorporation of  $^{32}\text{P}$  during high-temperature stress was poor, nor did we determine whether the  $^{32}\text{P}$  was incorporated on tyrosine or serine/threonine residues. Caffeine, vanadate and temperature affect protein phosphorylation on tyrosine residues in other systems (Maher and Pasquale, 1989; Brautigan, 1992; Aharoni et al., 1993). Altered tyrosine phosphorylation of the cadherin and catenin cell adhesion molecules can perturb their adhesiveness (Matsuyoshi et al., 1992; Behrens et al., 1993; Hamaguchi et al., 1993). Thus, temperature shock in *A. pulchella* may alter the levels of tyrosine phosphorylated cell adhesion proteins.

Temperature could affect protein phosphorylation by affecting kinase and phosphatase activity. There is little information about the temperature-sensitivities of these enzymes; smooth muscle phosphatase and myosin-associated muscle phosphatase have  $Q_{10}$  values of 5.3 and 5.2, respectively (Mitsui et al., 1994). Such a high  $Q_{10}$  indicates that these enzymes would be very temperature-sensitive (Hochachka and Somero, 1982). Heat shock also induces the synthesis of a tyrosine phosphatase in cultured human skin

cells, suggesting that the control of phosphorylation levels is important during environmental stress (Keyse and Emslie, 1992).

Temperature stress is not the only environmental factor that induces bleaching in symbiotic cnidarians; ultraviolet radiation can also cause bleaching (Lesser et al., 1990; Gleason and Wellington, 1993; Brown et al., 1994; Le Tissier and Brown, 1996). Ultraviolet radiation can induce oxidative stress in sea anemones and corals (Shick et al., 1991; Dykens et al., 1992; Nii and Muscatine, 1997). Oxidative stress can alter protein phosphorylation and impair cell adhesion in cell culture (Heffetz et al., 1990; Gailit et al., 1993; Barchowsky et al., 1994; Sullivan et al., 1994; Zhang et al., 1994; Feng et al., 1995; Whisler et al., 1995), so it may do so in symbiotic cnidarians. Oxidative stress stimulates both tyrosine and serine/threonine phosphorylation by inhibiting the respective protein phosphatases (Heffetz et al., 1990; Sullivan et al., 1994; Whisler et al., 1995). In addition, oxidative stress stimulates the expression of a tyrosine phosphatase (Keyse and Emslie, 1992), which is also induced by temperature shock in cell culture. That protein phosphatases are differentially affected by oxidative stress and temperature stress in cell culture lends support to the hypothesis that these enzymes may be involved in both temperature and ultraviolet-radiation-induced cnidarian bleaching. Altered protein phosphorylation could be the common mechanism by which both temperature and ultraviolet radiation induce cnidarian bleaching.

The authors would like to thank Dr G. Baghdasarian and Dr R. D. Gates for their many helpful discussions. This research was supported by NSF grant 9115834.

#### References

- Aharoni, D., Dantes, A. and Amsterdam, A. (1993). Cross-talk between adenylate cyclase activation and tyrosine phosphorylation leads to modulation of the actin cytoskeleton and to acute progesterone secretion in ovarian cells. *Endocrinology* **133**, 1426–1436.
- Allemand, D. and Benazet-Tambutte, S. (1996). Calcification in the Mediterranean red coral, *Corallium rubrum* (Linnaeus) (Cnidaria, Octocorallia). *J. Exp. Zool.* **276**, 270–278.
- Barchowsky, A., Williams, M. E., Benz, C. C. and Chepenik, K. P. (1994). Oxidant-sensitive protein phosphorylation in endothelial cells. *Free Radical Biol. Med.* **16**, 771–777.
- Bartlett, G. R. (1959). Phosphorus assay in column chromatography. *J. Biol. Chem.* **234**, 466–468.
- Behrens, J., Vakaet, L., Friis, R., Winterhager, E., VanRoy, F., Mareel, M. M. and Birchmeier, W. (1993). Loss of epithelial differentiation and gain of invasiveness correlates with tyrosine phosphorylation of the E-Cadherin/ $\beta$ -Catenin complex in cells transformed with a temperature-sensitive v-SRC gene. *J. Cell Biol.* **120**, 757–766.
- Benazet-Tambutte, S., Allemand, S. D. and Jaubert, J. (1996). Permeability of the oral epithelial layer in cnidarians. *Mar. Biol.* **126**, 43–53.
- Black, N. A., Voellmy, R. and Szmant, A. M. (1995). Heat shock protein induction in *Montastraea faveolata* and *Aiptasia pallida* exposed to elevated temperatures. *Biol. Bull.* **188**, 234–240.
- Blazyk, J. F. and Steim, J. M. (1972). Phase transitions in mammalian membranes. *Biochim. Biophys. Acta* **266**, 737–741.
- Bradford, M. (1976). A rapid and sensitive method for the quantitation of microgram quantities of protein utilizing the principles of protein-dye binding. *Analyt. Biochem.* **72**, 248–254.
- Brautigan, D. L. (1992). Great expectations: protein tyrosine phosphatases in cell regulation. *Biochim. Biophys. Acta* **114**, 63–77.

- Brown, B. E., Dunne, R. P. and Chansang, H.** (1996). Coral bleaching relative to elevated seawater temperature in the Andaman Sea (Indian Ocean) over the last 50 years. *Coral Reefs* **15**, 151–152.
- Brown, B. E., Dunne, R. P., Scoffin, T. P. and Le Tissier, M. D. A.** (1994). Solar damage in intertidal corals. *Mar. Ecol. Prog. Ser.* **105**, 219–230.
- Brown, B. E., Le Tissier, M. D. A. and Bythell, J. C.** (1995). Mechanisms of bleaching deduced from histological studies of reef corals sampled during a natural bleaching event. *Mar. Biol.* **122**, 655–663.
- Brown, B. E. and Suharsono** (1990). Damage and recovery of coral reefs affected by El Niño related sea water warming in the Thousand Islands, Indonesia. *Coral Reefs* **8**, 163–170.
- Chapman, D., Gomez-Fernandez, J. C. and Goni, F. M.** (1979). Intrinsic protein–lipid interactions. Physical and biochemical evidence. *FEBS Lett.* **98**, 211–223.
- Charles, A. C., Merrill, J. D., Dirksen, E. R. and Sanserson, M. J.** (1991). Intercellular signaling in glial cells: communicated waves and asynchronous calcium oscillations in response to mechanical stimulation and glutamate. *Neuron* **6**, 983–992.
- Cheng, K. H. and Lepock, J. R.** (1992). Inactivation of calcium uptake by EGTA is due to an irreversible thermotropic conformational change in the calcium binding domain of the Ca<sup>2+</sup>-ATPase. *Biochemistry* **31**, 4074–4080.
- Coakley, W. T.** (1987). Hyperthermia effects on the cytoskeleton and on cell morphology. *Soc. Exp. Biol.* **41**, 187–211.
- Coles, S. L. and Jokiel, P. L.** (1977). Effects of temperature on photosynthesis and respiration in hermatypic corals. *Mar. Biol.* **43**, 209–216.
- Cress, A. E., Majda, J. A., Glass, J. R., Stringer, D. E. and Gerner, E. W.** (1990). Alteration of cellular adhesion by heat shock. *Exp. Cell Res.* **190**, 40–46.
- D'Ancona, S., Mazzo, M. and Pea, F.** (1992). Increased spontaneous cell detachment of F10 cells induced *in vitro* by some calcium-channel blockers. *J. Chemotherapy* **4**, 235–238.
- Doino, J. A.** (1991). Low temperature acclimation in the sub-tropical sea anemone, *Aiptasia pulchella* (Carlagen). Masters thesis, UCLA, USA.
- Drobnis, E. Z., Crowe, L. M., Berger, T., Anchordoguy, T. J., Overstreet, J. W. and Crowe, J. H.** (1993). Cold shock damage is due to lipid phase transitions in cell membranes: a demonstration using sperm as a model. *J. Exp. Zool.* **265**, 432–437.
- Dubinsky, J. M.** (1993). Effects of calcium chelators on intracellular calcium and excitotoxicity. *Neurosci. Lett.* **150**, 129–132.
- Dykens, J. A., Shick, J. M., Benoit, C., Buettner, G. R. and Winston, G. W.** (1992). Oxygen radical production in the sea anemone *Anthopleura elegantissima* and its endosymbiotic algae. *J. Exp. Biol.* **168**, 219–241.
- Eriksson, J. K., Brautigan, D. L., Vallee, R., Olmsted, J., Fujiki, H. and Goldman, R. D.** (1992). Cytoskeletal integrity in interphase cells requires protein phosphatase activity. *Proc. Natl. Acad. Sci. USA* **89**, 11093–11097.
- Fang, L., Huang, S. and Lin, K.** (1997). High temperature induces the synthesis of heat-shock proteins and the elevation of intracellular calcium in the coral *Acropora grandis*. *Coral Reefs* **16**, 127–131.
- Feng, L., Xia, Y., Seiffert, D. and Wilson, C. B.** (1995). Oxidative stress-inducible protein tyrosine phosphatase in glomerulonephritis. *Kidney Int.* **48**, 1920–1928.
- Fitt, W. K., Spero, H. J., Halas, J., White, M. W. and Porter, J. W.** (1993). Recovery of the coral *Montastrea annularis* in the Florida Keys after the 1987 Caribbean 'bleaching event'. *Coral Reefs* **12**, 57–64.
- Forscher, P.** (1989). Calcium and polyphosphoinositide control of cytoskeletal dynamics. *Trends Neural Sci.* **11**, 468–474.
- Gailit, J., Coleflesh, D., Rabiner, I., Simone, J. and Goligorsky, M. S.** (1993). Redistribution and dysfunction of integrins in cultured renal epithelial cells exposed to oxidative stress. *Am. J. Physiol.* **264**, F149–F157.
- Gates, R. D.** (1990). Seawater temperature and sublethal coral bleaching. *Coral Reefs* **8**, 193–197.
- Gates, R. D., Baghdasarian, G. and Muscatine, L.** (1992). Temperature stress causes host cell detachment in symbiotic cnidarians: implications for coral bleaching. *Biol. Bull.* **182**, 324–332.
- Gates, R. D. and Muscatine, L.** (1992). Three methods for isolating viable anthozoan endoderm cell with their intracellular symbiotic dinoflagellates. *Coral Reef.* **11**, 143–145.
- Geiger, B., Ayalon, O., Ginsberg, D., Volberg, T., Rodriguez, J. L., Yarden, Y. and Ben-Ze'ev, A.** (1992). Cytoplasmic control of cell adhesion. *Cold Spring Harbor Symp. Quant. Biol.* **57**, 631–642.
- Glass, W. F. and Kreisberg, J. I.** (1993). Regulation of integrin-mediated adhesion at focal contacts by cAMP. *J. Cell. Physiol.* **157**, 296–306.
- Gleason, D. F. and Wellington, G. M.** (1993). Ultraviolet radiation and coral bleaching. *Nature* **365**, 836–838.
- Gleason, M. G.** (1993). Effects of disturbance on coral communities: bleaching in Moorea, French Polynesia. *Coral Reefs* **12**, 193–201.
- Glynn, P. W. and D'Croz, L.** (1990). Experimental evidence for high temperature stress as the cause of El Niño – coincident coral mortality. *Coral Reefs* **8**, 181–191.
- Goreau, T. J. and Hayes, R. L.** (1994). Coral bleaching and ocean hot spots. *Ambio* **23**, 176–180.
- Gregg, D. S., Werz, M. A. and MacDonald, R. L.** (1987). Forskolin and phorbol esters reduce the same potassium conductance of mouse neurons in culture. *Science* **235**, 345–348.
- Groden, D. L., Guan, A. and Stokes, B. T.** (1991). Determination of Fura-2 dissociation constants following adjustment of the apparent Ca-EGTA association constant for temperature and ionic strength. *Cell Calcium* **12**, 279–287.
- Grynkiwicz, G., Poenie, M. and Tsien, R. Y.** (1985). A new generation of Ca<sup>2+</sup> indicators with greatly improved fluorescence properties. *J. Biol. Chem.* **260**, 3440–3450.
- Hamaguchi, M., Matsuyoshi, N., Ohnishi, Y., Gotoh, B., Takeichi, M. and Nagai, Y.** (1993). p60<sup>v-src</sup> causes tyrosine phosphorylation and inactivation of the N-cadherin–catenin cell adhesion system. *EMBO J.* **12**, 307–314.
- Hayes, R. L. and Bush, P. G.** (1990). Microscopic observations of recovery in the reef-building scleractinian coral, *Montastrea annularis*, after bleaching on a Cayman reef. *Coral Reefs* **8**, 203–209.
- Heffetz, D., Bushkin, I., Dror, R. and Zick, Y.** (1990). The insulinomimetic agents H<sub>2</sub>O<sub>2</sub> and vanadate stimulate protein tyrosine phosphorylation in intact cells. *J. Biol. Chem.* **265**, 2896–2902.
- Hirano, S., Nose, A., Hatta, K., Kawakami, A. and Takeichi, M.** (1987). Calcium-dependent cell–cell adhesion molecules (cadherins): subclass specificities and possible involvement of actin bundles. *J. Cell Biol.* **105**, 2501–2510.
- Hochachka, P. W. and Somero, G. N.** (1984). *Biochemical Adaptation*. Princeton, NJ: Princeton University Press. 537pp.
- Hoegh-Guldberg, O. and Smith, G. J.** (1989). The effect of sudden changes in temperature, light and salinity the population density and export of zooxanthellae from the reef corals *Stylophora pistillata* Esper and *Seriatopora hystrix* Dana. *J. Exp. Mar. Biol. Ecol.* **129**, 279–303.
- Holliday, J., Adams, R. J., Sejnowski, T. J. and Spitzer, N. C.** (1991). Calcium-induced release of calcium regulates differentiation of cultured spinal neurons. *Neuron* **7**, 787–796.
- Hsie, A. W. and Puck, T. T.** (1971). Morphological transformation of Chinese hamster cells by dibutyl adenosine cyclic 3',5'-monophosphate and testosterone. *Proc. Natl. Acad. Sci. USA* **68**, 358–361.
- Huang, S.-P., Lin, K.-K. and Fang, L.-S.** (1998). The involvement of calcium in heat-induced coral bleaching. *Zool. Studies* **37**, 89–94.
- Hubbell, W. L., Froncisz, W. and Hyde, J. S.** (1987). Continuous and stopped flow EPR spectrometer based on a loop gap resonator. *Rev. Sci. Instrum.* **58**, 31–35.
- Ishitani, K., Ikeda, K., Sunose, H., Wu, D., Honda, H. and Takasaka, T.** (1995). Xanthine derivatives inhibit the increase in intracellular Ca<sup>2+</sup> concentration induced by acetylcholine in nasal gland acinar cells of the guinea-pig. *Eur. Resp. J.* **8**, 2114–2119.
- Jokiel, P. L. and Coles, S. L.** (1990). Response of Hawaiian and other Indo-Pacific reef corals to elevated temperature. *Coral Reefs* **8**, 155–162.
- Jones, R. J., Hoegh-Guldberg, O., Larkum, A. W. D. and Schrieber, U.** (1998). Temperature-induced bleaching of corals begins with impairment of the CO<sub>2</sub> fixation mechanism in zooxanthellae. *Plant Cell Env.* **21**, 1219–1230.
- Jurado, A. S., Pinheiro, T. J. and Madeira, V. M.** (1991). Physical studies on membrane lipids of *Bacillus stearothermophilus* temperature and calcium effects. *Arch. Biochem. Biophys.* **289**, 167–179.
- Kass, G. E. N., Duddy, S. K., Moore, G. A. and Orrenius, S.** (1989). 2,5-Di(tert-butyl)-1,4-benzohydroquinone rapidly elevates cytosolic Ca<sup>2+</sup> concentration by mobilizing the inositol 1,4,5-trisphosphate-sensitive Ca<sup>2+</sup> pool. *J. Biol. Chem.* **264**, 15192–15198.
- Keyse, S. M. and Emslie, E. A.** (1992). Oxidative stress and heat shock induce a human gene encoding a protein-tyrosine phosphatase. *Nature* **359**, 644–647.
- Kitamura, K., Ueno, H., Kanmura, Y., Inque, R. and Kuriyama, H.** (1986). The stabilization of vascular smooth muscle by procaine. *Drugs Exp. Clin. Res.* **9/10**, 773–784.
- Klein, M. G., Simon, B. J. and Schneider, M. F.** (1992). Effects of procaine and caffeine on calcium release from the sarcoplasmic reticulum in frog skeletal muscle. *J. Physiol., Lond.* **453**, 341–366.
- Kleppel, G. S., Dodge, R. E. and Reese, C. J.** (1989). Changes in

- pigmentation associated with the bleaching of stony corals. *Limnol. Oceanogr.* **34**, 1331–1335.
- Kreisberg, J. I. and Venkatachalam, M. A.** (1986). Vasoactive agents affect mesangial cell adhesion. *Am. J. Physiol.* **251**, F227–F235.
- Lamb, N. J. C., Fernandez, A., Conti, M. A., Adelstein, R., Glass, D. B., Welch, W. J. and Feramisco, J. R.** (1988). Regulation of actin microfilament integrity in living nonmuscle cells by the cAMP-dependent protein kinase and the myosin light chain kinase. *J. Cell Biol.* **106**, 1955–1971.
- Lasker, H. R., Peters, E. C. and Coffroth, M. A.** (1984). Bleaching of reef coelenterates in the San Blas Islands, Panama. *Coral Reefs* **3**, 183–190.
- Lee, H. C.** (1993). Potentiation of calcium- and caffeine-induced calcium release by cyclic ADP-ribose. *J. Biol. Chem.* **268**, 293–299.
- Lesser, M. P.** (1996). Elevated temperatures and ultraviolet radiation cause oxidative stress and inhibit photosynthesis in symbiotic dinoflagellates. *Limnol. Oceanogr.* **41**, 271–283.
- Lesser, M. P., Stochaj, W. R., Tapley, D. W. and Shick, J. M.** (1990). Bleaching in coral reef anthozoans: effects of irradiance, ultraviolet radiation and temperature on the activities of protective enzymes against active oxygen. *Coral Reefs* **8**, 225–232.
- Le Tissier, M. D. A. and Brown, B. E.** (1996). Dynamics of solar bleaching in the intertidal reef coral *Goniastrea aspera* at Ko Phuket, Thailand. *Mar. Ecol. Prog. Ser.* **136**, 235–244.
- Li, A. P., O'Neill, P., Kawashima, K. and Hsie, A. W.** (1977). Correlation between changes in intracellular level of cAMP, activation of cAMP-dependent protein kinase and the morphology of Chinese hamster ovary cells in culture. *Arch. Biochem. Biophys.* **182**, 181–187.
- Lytton, J., Westlin, M. and Hanley, M. R.** (1991). Thapsigargin inhibits the sarcoplasmic or endoplasmic reticulum Ca-ATPase family of calcium pumps. *J. Biol. Chem.* **266**, 17067–17071.
- Maher, P. A. and Pasquale, E. B.** (1989). Heat shock induces protein tyrosine phosphorylation in cultured cells. *J. Cell Biol.* **108**, 2029–2035.
- Matsumura, F. and Yamashiro, S.** (1993). Caldesmon. *Curr. Opin. Cell Biol.* **5**, 70–76.
- Matsuyoshi, N., Hamaguchi, M., Taniguchi, S., Nagafuchi, A., Tsukita, S. and Takeichi, M.** (1992). Cadherin-mediated cell–cell adhesion is perturbed by v-src tyrosine phosphorylation in metastatic fibroblasts. *J. Cell Biol.* **118**, 703–714.
- McConnell, H. M., Wright, K. L. and McFarland, B. G.** (1972). The fraction of the lipid in a biological membrane that is in a fluid state: a spin label assay. *Biochem. Biophys. Res. Commun.* **47**, 273–281.
- Meissner, G.** (1986). Ryanodine activation and inhibition of the Ca<sup>2+</sup> release channel of sarcoplasmic reticulum. *J. Biol. Chem.* **261**, 6300–6306.
- Melchior, D. and Steim, J. M.** (1976). Thermotropic transitions in biomembranes. *Annu. Rev. Biophys. Bioeng.* **5**, 205–238.
- Miller, D., Brown, B. E., Sharp, V. A. and Nganro, N.** (1992). Changes in the expression of soluble proteins extracted from the symbiotic anemone *Anemonia viridis* accompany bleaching induced hyperthermia and metal stressors. *J. Therm. Biol.* **17**, 217–223.
- Miller, S. S., Wolf, A. M. and Arnaud, C. D.** (1976). Bone cells in culture: Morphologic transformation by hormones. *Science* **192**, 1340–1343.
- Mitsui, T., Kitazawa, T. and Ikebe, M.** (1994). Correlation between high temperature dependence of smooth muscle myosin light chain phosphatase activity and muscle relaxation rate. *J. Biol. Chem.* **269**, 5842–5848.
- Monck, J. R., Reynolds, E. E., Thomas, A. P. and Williamson, J. R.** (1988). Novel kinetics of single cell Ca<sup>2+</sup> transients in stimulated hepatocytes and A10 cells measured using Fura-2 and fluorescent videomicroscopy. *J. Biol. Chem.* **263**, 4569–4575.
- Moore, G. A., McConkey, D. J., Kass, G. E. N., O'Brian, P. J. and Orrenius, S.** (1987). 2,5-Di(tert-butyl)-1,4-benzohydroquinone – a novel inhibitor of liver microsomal Ca<sup>2+</sup> sequestration. *FEBS Lett.* **224**, 331–336.
- Muscantine, L., Grossman, D. and Doino, J.** (1991). Release of symbiotic algae by tropical sea anemones and corals after cold shock. *Mar. Ecol. Prog. Ser.* **77**, 233–243.
- Nagafuchi, A. and Takeichi, M.** (1988). Cell binding function of E-cadherin is regulated by the cytoplasmic domain. *EMBO J.* **7**, 3679–3684.
- Nii, C. M. and Muscantine, L.** (1997). Oxidative stress in the symbiotic sea anemone *Aiptasia pulchella* (Carlagen, 1943): contribution of the animal to superoxide ion production at elevated temperature. *Biol. Bull.* **192**, 444–456.
- O'Brien, T. L. and Wyttenbach, C. R.** (1980). Some effects of temperature on the symbiotic association between zoochlorellae (chlorophyceae) and the sea anemone *Anthopleura xanthogrammica*. *Trans. Am. Microsc. Soc.* **99**, 221–225.
- Ortiz, J. R., Yamada, T. and Hsie, A. W.** (1973). Induction of the stellate configuration in cultured iris epithelial cells by adenosine and compounds related to adenosine 3',5'-cyclic monophosphate. *Proc. Natl. Acad. Sci. USA* **70**, 2286–2290.
- Owen, C. S.** (1991). Spectra of intracellular Fura-2. *Cell Calcium* **12**, 385–393.
- Parks, J. E. and Lynch, D. V.** (1992). Lipid composition and thermotropic phase behavior of boar, bull, stallion and rooster sperm membranes. *Cryobiol.* **29**, 255–266.
- Porter, J. W., Fitt, W. K., Spero, H. J., Rogers, C. S. and White, M. W.** (1989). Bleaching in reef corals: physiological and stable isotopic responses. *Proc. Natl. Acad. Sci. USA* **86**, 9342–9346.
- Quinn, P. J.** (1988). Effects of temperature on cell membranes. *Soc. Exp. Biol.* **57**, 237–258.
- Quinn, P. J.** (1989). Principles of membrane stability and phase behavior under extreme conditions. *J. Bioenerg. Biomembr.* **21**, 3–19.
- Raison, J. K., Lyons, J. M., Mehlhorn, R. J. and Keith, A. D.** (1971). Temperature-induced phase changes in mitochondrial membranes detected by spin labeling. *J. Biol. Chem.* **246**, 4036–4040.
- Romer, L. H., Burridge, K. and Turner, C. E.** (1992). Signaling between the extracellular matrix and the cytoskeleton: Tyrosine phosphorylation and focal adhesion assembly. *Cold Spring Harbor Symp. Quant. Biol.* **57**, 193–202.
- Ruiz-Sanz, J., Ruiz-Cabello, J., Mateo, P. L. and Cortijo, M.** (1992). The thermal transition in crude myelin proteolipid has a lipid rather than protein origin. *Eur. Biophys. J.* **21**, 71–76.
- Sanderson, M. J., Charles, A. C. and Dirksen, E. R.** (1990). Mechanical stimulation and intercellular communication increased intracellular Ca<sup>2+</sup> in epithelial cells. *Cell Regulation* **1**, 267–292.
- Sastry, S. K. and Horowitz, A. F.** (1993). Integrin cytoplasmic domains: mediators of cytoskeletal linkages and extra- and intracellular initiated transmembrane signaling. *Curr. Opin. Cell Biol.* **5**, 819–831.
- Sawyer, S. J.** (1998). The cellular mechanism of temperature-induced cnidarian bleaching. PhD thesis, UCLA, USA.
- Sharp, V. A., Miller, D., Bythell, J. C. and Brown, B. E.** (1994). Expression of low molecular weight HSP 70 related polypeptides from the sea anemone *Anemonia viridis* Forskål in response to heat shock. *J. Exp. Mar. Biol.* **179**, 179–193.
- Shick, J. M., Lesser, M. P. and Stochaj, W. R.** (1991). Ultraviolet radiation and photooxidative stress in zooxanthellate anthozoa: the sea anemone *Phyllo-discus semoni* and the octocoral *Clavularia* sp. *Symbiosis* **10**, 145–173.
- Shimshick, E. J. and McConnell, H. M.** (1973). Lateral phase separation in phospholipid membranes. *Biochemistry* **12**, 2351–2360.
- Simasko, S. M. and Yan, S.** (1993). 3-Isobutyl-1-methylxanthine inhibits sustained calcium current independently of cAMP in neuronal and endocrine cells. *Mol. Pharmacol.* **44**, 622–627.
- Snow, P. and Nuccitelli, R.** (1993). Calcium buffer injections delay cleavage in *Xenopus laevis* blastomeres. *J. Cell Biol.* **122**, 387–394.
- Spruill, W. A., White, M. G., Steiner, A. L., Tres, L. L. and Kierzenbaum, A. L.** (1981). Temporal sequence of cell shape changes in cultured rat Sertoli cells after experimental elevation of intracellular cAMP. *Exp. Cell Res.* **131**, 131–148.
- Steinbach, J. H. and Schubert, D.** (1975). Multiple modes of dibutyl cyclic AMP-induced process formation by clonal nerve and glial cells. *Exp. Cell Res.* **91**, 449–453.
- Suharsono, Pipe, R. K. and Brown, B. E.** (1993). Cellular and ultrastructural changes in the endoderm of the temperate sea anemone *Anemonia viridis* as a result of increased temperature. *Mar. Biol.* **116**, 311–318.
- Sullivan, S. G., Chiu, D. T.-Y., Errasfa, M., Wang, J. M., Qi, J.-S. and Stern, A.** (1994). Effects of H<sub>2</sub>O<sub>2</sub> on protein tyrosine phosphatase activity in HER14 cells. *Free Radical Biol. Med.* **16**, 399–403.
- Szmat, A. M. and Gassman, N. J.** (1990). The effects of prolonged 'bleaching' on the tissue biomass and reproduction of the reef coral *Montastrea annularis*. *Coral Reefs* **8**, 217–224.
- Takeichi, M. S., Hirano Matsuyoshi, N. and Fujimori, T.** (1992). Cytoplasmic control of cadherin-mediated cell–cell adhesion. *Cold Spring Harbor Symp. Quant. Biol.* **57**, 327–334.
- Tambutte, E., Allemand, D., Bourge, I., Gattuso, J.-P. and Jaubert, J.** (1995). An improved <sup>45</sup>Ca protocol for investigating physiological mechanisms in coral calcification. *Mar. Biol.* **12**, 453–459.
- Thastrup, O.** (1990). Role of Ca<sup>2+</sup>-ATPases in regulation of Ca<sup>2+</sup> signaling, as studied with the selective microsomal Ca<sup>2+</sup>-ATPase inhibitor, thapsigargin. *Agents Actions* **29**, 8–15.

- Thastrup, O., Cullen, P. J., Drobak, B. K., Hanley, M. R. and Dawson, A. P.** (1990). Thapsigargin, a tumor promoter, discharges intracellular  $\text{Ca}^{2+}$  stores by specific inhibition of the endoplasmic reticulum  $\text{Ca}^{2+}$ -ATPase. *Proc. Natl. Acad. Sci. USA* **87**, 2466–2470.
- Thastrup, O., Dawson, A. P., Scharff, O., Foder, B., Cullen, P. J., Drobak, B. K., Bjerrum, P. J., Christensen, S. B. and Hanley, M. R.** (1989). Thapsigargin, a novel molecular probe for studying intracellular calcium release and storage. *Agents Actions* **27**, 17–23.
- Tsunoda, Y.** (1993). Receptor-operated  $\text{Ca}^{2+}$  signaling and crosstalk in stimulus secretion coupling. *Biochim. Biophys. Acta* **1154**, 105–156.
- Usachev, Y. and Verkhatsky, A.** (1995). IBMX induces calcium release from intracellular stores in rat sensory neurons. *Cell Calcium* **17**, 197–206.
- Uyeda, T. Q. and Furuya, M.** (1986). Effects of low temperature and calcium on microfilament structure in flagellates of *Physarum polycephalum*. *Exp. Cell Res.* **165**, 461–472.
- Van Bergen En Henegouwen, P. M. P. M., Jordi, W. J. R., Van Dongen, G., Ramaekers, J., Amesz, F. C. S. and Linnemans, W. A. M.** (1985). Studies on a possible relationship between alterations in the cytoskeleton and induction of heat shock protein synthesis in mammalian cells. *Int. J. Hyperthermia* **1**, 69–83.
- Volberg, T., Geiger, B., Dror, R. and Zick, Y.** (1991). Modulation of intercellular adherens-type junctions and tyrosine phosphorylation of their components in RSV-transformed cultured chick lens cells. *Cell Regulation* **2**, 105–120.
- Volberg, T., Zick, Y., Dror, R., Sabanay, I., Gilon, C., Levitzki, A. and Geiger, B.** (1992). The effect of tyrosine-specific protein phosphorylation on the assembly of adherens-type junctions. *EMBO J.* **11**, 1733–1742.
- Walter, G. and Mumby, M.** (1993). Protein serine/threonine phosphatases and cell transformation. *Biochim. Biophys. Acta* **1155**, 207–226.
- Walter, M. F., Peterson, N. S. and Biessmann, H.** (1990). Heat shock causes the collapse of the intermediate filament cytoskeleton in *Drosophila* embryos. *Dev. Gen.* **11**, 270–279.
- Warner, M. E., Fitt, W. K. and Schmidt, G. W.** (1999). Damage to photosystem II in symbiotic dinoflagellates: a determinant of coral bleaching. *Proc. Natl. Acad. Sci. USA* **96**, 8007–8012.
- Watson, P. F. and Morris, G. J.** (1987). Cold shock injury in animal cells. *Symposia Soc. Exp. Biol.* **41**, 311–340.
- Weeds, A. and Maciver, S.** (1993). F-actin capping proteins. *Curr. Opin. Cell Biol.* **5**, 63–69.
- Whisler, R. L., Goyette, M. A., Grants, I. S. and Newhouse, Y. G.** (1995). Sublethal levels of oxidant stress stimulate multiple serine/threonine kinases and suppress protein phosphatases in Jurkat T cells. *Arch. Biochem. Biophys.* **319**, 23–35.
- Williams, E. H. and Bunkley-Williams, L.** (1990). The world-wide coral reef bleaching cycle and related sources of coral mortality. *Atoll Res. Bull.* **335**, 1–71.
- Yeagle, P.** (1987). *The Membranes of Cells*. Orlando, FL: Academic Press, Inc.
- Zhang, Z., Turner, D. C., Drzewiecki, G. J., Hinshaw, D. B. and Hyslop, P. A.** (1994). Impairment of integrin-mediated cell-matrix adhesion in oxidant-stressed PC12 cells. *Brain Res.* **662**, 189–197.
